# 1 **Core Circadian Clock Genes *Per1* and *Per2* regulate the Rhythm in Photoreceptor Outer Segment** 2 **Phagocytosis**

3 Nemanja Milićević<sup>1,2\*</sup>, Ouafa Ait-Hmyed Hakkari<sup>2\*</sup>, Udit Bagchi<sup>1,2</sup>, Cristina Sandu<sup>2</sup>, Aldo Jongejan<sup>5</sup>, Perry D.  
4 Moerland<sup>5</sup>, Jacoline B. ten Brink<sup>1</sup>, David Hicks<sup>2</sup>, Arthur A. Bergen<sup>1,3,4^#</sup>, Marie-Paule Felder-Schmittbuhl<sup>2^#</sup>

5  
6 <sup>1</sup> Department of Clinical Genetics, Amsterdam UMC, University of Amsterdam, Meibergdreef 9, 1105 AZ,  
7 Amsterdam, the Netherlands

8 <sup>2</sup> Centre National de la Recherche Scientifique, Université de Strasbourg, Institut des Neurosciences  
9 Cellulaires et Intégratives, 8 Allée du Général Rouvillois, F-67000 Strasbourg, France

10 <sup>3</sup> Department of Ophthalmology, Amsterdam UMC, University of Amsterdam, Meibergdreef 9, 1105 AZ,  
11 Amsterdam, the Netherlands

12 <sup>4</sup> Netherlands Institute for Neuroscience (NIN-KNAW), Meibergdreef 47, 1105 BA, Amsterdam, the  
13 Netherlands

14 <sup>5</sup> Bioinformatics Laboratory, Department of Epidemiology and Data Science, Amsterdam Public Health  
15 research institute, Amsterdam UMC, Meibergdreef 9, 1105 AZ, Amsterdam, the Netherlands.

16

17 \* Equal first author contribution

18 ^ Equal last author contribution

19 # Corresponding authors: aabergen@amsterdamumc.nl; feldermp@inci-cnrs.unistra.fr

20

21 **ORCID:** Nemanja Milićević 0000-0002-8062-7270; Udit Bagchi 0000-0001-7726-0319; Cristina Sandu 0000-  
22 0001-8836-5837; Aldo Jongejan 0000-0002-8948-2549; Perry D. Moerland 0000-0002-2357-3659; Arthur A.  
23 Bergen 0000-0002-6333-9576; Marie-Paule Felder-Schmittbuhl 0000-0003-3539-1243

24

## 25 **Abstract**

26

27 Retinal photoreceptors undergo daily renewal of their distal outer segments, a process indispensable for  
28 maintaining retinal health. Photoreceptor Outer Segment (POS) phagocytosis occurs as a daily peak, roughly  
29 about one hour after light onset. However, the underlying cellular and molecular mechanisms which initiate  
30 this process are still unknown. Here we show that, under constant darkness, mice deficient for core circadian  
31 clock genes (*Per1* and *Per2*), lack a daily peak in POS phagocytosis. By qPCR analysis we found that core clock  
32 genes were rhythmic over 24h in both WT and *Per1*, *Per2* double mutant whole retinas. More precise  
33 transcriptomics analysis of laser capture microdissected WT photoreceptors revealed no differentially

34 expressed genes between time-points preceding and during the peak of POS phagocytosis. By contrast, we  
35 found that microdissected WT retinal pigment epithelium (RPE) had a number of genes that were  
36 differentially expressed at the peak phagocytic time-point compared to adjacent ones. We also found a  
37 number of differentially expressed genes in *Per1*, *Per2* double mutant RPE compared to WT ones at the peak  
38 phagocytic time-point. Finally, based on STRING analysis we found a group of interacting genes which  
39 potentially drive POS phagocytosis in the RPE. This potential pathway consists of genes such as: *Pacsin1*, *Syp*,  
40 *Camk2b* and *Camk2d* among others. Our findings indicate that *Per1* and *Per2* are necessary clock components  
41 for driving POS phagocytosis and suggest that this process is transcriptionally driven by the RPE.

42

43 **Keywords:** photoreceptor, retinal pigment epithelium, circadian rhythm, phagocytosis, clock gene,  
44 photoreceptor outer segment

45

46 **Declarations:**

47 **Funding:** This project has been funded with support from the NeuroTime Erasmus+ grant (European Union),  
48 Rotterdamse Stichting Blindenbelangen (Netherlands), Nelly Reef fund (Netherlands), Stichting voor  
49 Ooglijders (Netherlands), Stichting tot Verbetering van het Lot der Blinden (Netherlands) and Retina France  
50 (France).

51 **Conflicts of interest/Competing interests:** The authors declare no competing interests.

52 **Availability of data and material:** Data supporting the conclusions of this article are included within the  
53 article and are available from the corresponding authors on reasonable request.

54 **Code availability:** The R code for analysis is available from the corresponding authors on reasonable request.

55 **Ethics approval:** All experimental procedures were performed in accordance with the Association for  
56 Research in Vision and Ophthalmology Statement on Use of Animals in Ophthalmic and Vision Research, as  
57 well as with the European Union Directive (2010/63/EU).

58 **Consent to participate:** Not applicable

59 **Consent for publication:** All authors read and approve of the contents of this manuscript.

60 **Author contributions:** N.M. performed experiments, analysis, prepared figures, wrote the manuscript and  
61 obtained funding. O.A.-H.H. performed experiments, data analysis, prepared figures and obtained funding.  
62 P.D.M. and A.J. performed bioinformatics analysis and edited the manuscript. U.B., J.B.t.B. and C.S. provided  
63 technical assistance, performed experiments, prepared figures and edited the manuscript. D.H., A.A.B. and  
64 M.-P.F.-S. conceptualized and directed the project, obtained funding, provided resources, performed analysis  
65 and edited the manuscript.

66 **Abbreviations:**

67 Bmal1, Brain and Muscle ARNT-Like 1; BP, biological process; CPM, counts per million; Cry, Cryptochrome;  
68 DD, constant darkness; DEGs, differentially expressed genes; FDR, false discovery rate; Hpvt, Hypoxanthine  
69 Phosphoribosyltransferase; KEGG, Kyoto encyclopedia of genes and genomes; LCM, laser capture  
70 microdissection; LD, light-dark cycle; MF, molecular function; Per, Period; POS, photoreceptor outer segment;  
71 ROS, rod outer segment; Ror, RAR-related orphan receptor; RPE, retinal pigment epithelium; SCN,  
72 suprachiasmatic nucleus; Tbp, TATA-Box binding Protein; WP, WikiPathways; WT, wild type, ZT, Zeitgeber  
73 time.

74

## 75 **Introduction**

76 Light/dark transitions are one of the hallmarks of life on Earth. Living organisms adapt their behavior and  
77 physiology according to cyclic changes in environmental conditions. In mammals, these rhythmic  
78 adjustments in molecular and cellular physiology are enabled through a hierarchical network of oscillators,  
79 encompassing a “central clock” located in the suprachiasmatic nucleus (SCN) in the brain and peripheral  
80 oscillators [1]. The core molecular components generating these oscillations are comprised of interlocking  
81 transcriptional-translational feedback loops involving “clock” transcription factors such as PER1-2, CLOCK,  
82 BMAL1, CRY1-2, REV-ERBs and RORs [2]. These factors drive rhythmic expression of “clock-controlled genes”  
83 thereby enabling rhythmic adaptations in physiology.

84

85 The retina stands out as a peripheral oscillator as it lies in direct contact with the main environmental  
86 synchronizing stimulus – light [3]. This light-sensitive organ is composed of multiple layers of cells, all of which  
87 were shown to oscillate in a layer-specific manner and are strongly coupled [4]. Numerous aspects of retinal  
88 physiology and functions were shown to be rhythmic [5] such as melatonin release [6,7], rod-cone coupling  
89 [8,9], visual sensitivity [10,11] and photoreceptor disc shedding [12]. Of all retinal cells, circadian oscillations  
90 in photoreceptors have been most extensively studied (reviewed by [13]).

91

92 Retinal photoreceptors are specialized, light-sensitive neuronal cells. They are metabolically highly active  
93 cells in which homeostasis is tightly controlled. They consist of a cell body, a specialized synapse, inner and  
94 outer segments. Together with the adjacent retinal pigment epithelium (RPE), the POS contain the molecular  
95 machinery that sustains phototransduction. Excessive light exposure can damage these cells. A mechanism  
96 that prevents the accumulation of photo-oxidative compounds is rapid POS renewal [14]. This turnover  
97 involves several critical steps. At the proximal POS end, these steps include synthesis and intracellular  
98 transport of structural and functional proteins. At the distal end, POS fragments are shed and subsequently  
99 phagocytosed by the RPE. Impairment of phagocytosis was previously implicated in photoreceptor  
100 degeneration in both animal models [15] and humans [16]. Despite many studies devoted to the subject, the

101 molecular mechanisms that control POS phagocytosis remain elusive [5,17,18]. Phagocytosis of POS was  
102 shown to be highly cyclic, taking place in rods as a daily peak occurring about one hour after light is turned  
103 on in both nocturnal and diurnal mammals [12,19,20]. This peak is maintained under constant darkness,  
104 implicating circadian control. However, little is known about the transcriptional events that occur prior and  
105 during the peak of POS phagocytosis.

106

107 In the present study, we tested the hypothesis that *Per1* and *Per2* are necessary clock components for  
108 initiating the phagocytosis of rod outer segment in mice. We investigated the transcriptional changes that  
109 occur in the RPE and photoreceptors prior and during the peak in POS phagocytosis. Finally, we proposed a  
110 potential pathway for initiating POS phagocytosis based on our transcriptomics data obtained from multiple  
111 time-points, purest possible microdissected sample material and phagocytically arrhythmic *Per1*, *Per2* mouse  
112 double knockout model.

113

## 114 **Methods**

115

### 116 **Animals**

117

118 Experiments were conducted using homozygote double mutant mice carrying the loss-of-function mutation  
119 of *mPer1* gene (*Per1*<sup>-/-</sup>; [21]) and mutation of the *mPer2* gene (*Per2*<sup>Brdm1</sup>, [22]; hereafter defined as *Per1*<sup>-/-</sup>  
120 *Per2*<sup>Brdm1</sup> or KO). Intercrosses between heterozygous (C57BL/6/J x 129 SvEvBrd) F1 offspring gave rise to F2  
121 homozygous mutants. Mutant and wild-type (WT) animals on this mixed background were used in this study,  
122 maintained as described in [23]. Mice were maintained in our animal facilities (Chronobiotron, UMS3415,  
123 Strasbourg, France) on a 12h light/12h dark (LD) cycle (300 lux during the light phase), with an ambient  
124 temperature of 22 ± 1 °C. The animals were given free access to food and water. In all experiments, control  
125 and mutant mice were age-matched. Only male mice were used for the RNAseq study, but both males and  
126 females were used for qPCR experiments and phagocytosis analysis. All experimental procedures were  
127 performed in accordance with the Association for Research in Vision and Ophthalmology Statement on Use  
128 of Animals in Ophthalmic and Vision Research, as well as with the European Union Directive (2010/63/EU).  
129 Age-matched WT and *Per1*<sup>-/-</sup>*Per2*<sup>Brdm1</sup> mice (6 weeks old) were sacrificed in constant darkness (dark/dark, DD)  
130 at time-points (expressed in circadian time (CT); CT0 – time when lights were on during LD conditions, CT12  
131 – lights off in LD conditions) specific to each experiment. Sacrifice was performed under complete darkness  
132 by using night-vision goggles ATN NVG-7 (American Technologies Network Corp., San Francisco, CA, USA) and  
133 eye sampling was done under dim red light (< 5 lux). Animals were anesthetized by CO<sub>2</sub> inhalation and  
134 subsequently killed by cervical dislocation.

135

## 136 **Genotyping**

137

138 Mice were genotyped by PCR amplification of tail DNA with 4 sets of primers specific either for the genomic  
139 regions that were deleted in mutants but present in WT (5'-GTCTTGGTCTCATTCTAGGACACC and 5'-  
140 AACATGAGAGCTTCCAGTCCTCTC for *Per1* gene; 5'-AGTAGGTCGTCTTCTTTATGCCCC and 5'-  
141 CTCTGCTTTCAACTCCTGTGTCTG for *Per2* gene), or for the recombinant alleles present in mutants only (5'-  
142 ACAAACTCACAGAGCCCATCC and 5'-ACTTCCATTTGTCACGTCCTGCAC for *Per1*<sup>-/-</sup>, 5'-  
143 TTTGTTCTGTGAGCTCCTGAACGC and 5'-ACTTCCATTTGTCACGTCCTGCAC for *Per2*<sup>Brdm1</sup>).

144

## 145 **Immunohistochemistry**

146

147 Eye globes were immersion-fixed in 4% paraformaldehyde in phosphate-buffered saline (PBS) overnight at  
148 4°C. Eyeballs were rinsed in PBS, cut into two hemispheres and cryoprotected upon transfer to an ascending  
149 series of sucrose solutions (10%, 20% and 30% each for 1h) and then embedded (Tissue-Tek OCT compound;  
150 Thermo-Shandon, Pittsburg, PA, USA). Cryostat sections (10 µm thick) were permeabilized for 5 min with 0.1%  
151 Triton X-100 and saturated with PBS containing 0.1% bovine serum albumin, 0.1% Tween-20 and 0.1% sodium  
152 azide for 30 min. Sections were incubated overnight at 4°C with monoclonal anti-rhodopsin antibody Rho-  
153 4D2 [24]. Secondary antibody incubation was performed at room temperature for 2h with Alexa 488 anti-  
154 mouse IgG-conjugated antibodies (Molecular Probes Inc., Eugene, OR, USA). Cell nuclei were stained with  
155 DAPI (Molecular Probes). Slides were washed thoroughly, mounted in PBS/glycerol (1:1), and observed by an  
156 epifluorescence microscope (Nikon Optiphot 2). The number of phagosomes was quantified, as described  
157 previously by us [19]. Transverse sections (n=4/animal) were obtained from the central retina, covering the  
158 whole width of the retina from one periphery to the other. Taking the POS/RPE interface as a baseline, any  
159 immunopositive inclusion exceeding 1 µm lying within the RPE subcellular space was scored as a phagosome.  
160 Phagosomes were counted by aligning a 150 x 150 µm<sup>2</sup> grid parallel with the RPE layer and displacing it  
161 dorsally and ventrally with respect to the optic nerve, along the POS/RPE interface, from the posterior to the  
162 superior margin. The phagosome counts are expressed as the sum of all 4 sections/eye.

163

## 164 **RT-qPCR gene expression analysis**

165

166 Retinas were sampled immediately after sacrifice. A small incision was performed on the cornea with a sterile  
167 blade, lens and vitreous were discarded, and the retina was directly collected with sterile forceps and  
168 immediately frozen in liquid nitrogen and stored at -80 °C.

169

170 Retinas were homogenized in the RNable (Eurobio Scientific, France) solution by using a 23-gauge sterile  
171 needle and 1 ml syringe and mRNA extracted according to the manufacturer's recommendations.  
172 Resuspended RNA was treated with DNase I (0.1 U/ $\mu$ l, 30 min, 37°C - Fermentas) followed by  
173 phenol/chloroform/isoamylalcohol extraction and sodium acetate/isopropanol precipitation. RNA  
174 concentration and purity were measured using NanoDrop ND-1000V 3.5 Spectrophotometer (NanoDrop  
175 Technologies, Wilmington, DE, USA; A260/A280 and A260/A230 values were between 1.8 and 2). RNA quality  
176 was evaluated with the Bioanalyzer 2100 (Agilent Technologies; RNA integrity numbers were between 7.8  
177 and 9).

178

179 500 ng of total RNA were reverse transcribed by using random primers and the "High Capacity RNA-to-cDNA"  
180 kit (Applied Biosystems, Foster City, CA, USA) following the manufacturer's instructions. qPCR was performed  
181 using the 7300 Real-Time PCR System (Applied Biosystems) and the hydrolyzed probe-based TaqMan  
182 chemistry, with optimized Gene Expression Assays designed for specific mRNA amplification (**Table S1**). We  
183 used the TaqMan Universal PCR Master Mix with No AMPErase UNG (Applied Biosystems) and 1 $\mu$ l of cDNA  
184 in a total volume of 20  $\mu$ l. The PCR program was; 10 min at 95°C and then 40 cycles of 15 s at 95°C and 1 min  
185 at 60°C. The fluorescence acquisition was performed at the end of the elongation step (7300 System  
186 Sequence Detection Software V 1.3.1 - Applied Biosystems). Each PCR reaction was done in duplicate. A  
187 dilution curve of the pool of all cDNA samples from one series was used to determine working dilution and  
188 to calculate the amplification efficiency for each assay (values were between 1.8 and 2 for all assays). No-  
189 template control reactions were performed as negative controls for each assay. One 96-well plate  
190 corresponded to the analysis of one gene. Data analysis was performed with qBase software (free v1.3.5) [25]  
191 and transcript levels were normalized using *Hprt* and *Tbp* that showed constant expression in their mRNA  
192 during the 24-h cycle (data not shown). Average gene expression levels within one experiment (one genotype)  
193 were set to 1, so that amplitudes (representing the maximal deviation from this 100% mean) could be  
194 compared between groups as was previously performed by Hiragaki and colleagues [26].

195

### 196 **Laser Capture Microdissection**

197

198 Eye globes were enucleated under dim red light (<5 lux), embedded in OCT, snap-frozen and stored at -80°C  
199 until use. Eyes were cryosectioned at 10  $\mu$ m thickness. Each eye provided 116 – 258 sections. All sections  
200 were dehydrated with ethanol and stained with Cresyl Violet staining (LCM Staining Kit, Ambion) and air-  
201 dried before microdissection with a Laser Microdissection System (LCM; PALM, Bernried, Germany). The RPE  
202 and photoreceptors were isolated with LCM (**Fig. S1**). The number of eye sections used for LCM RPE and

203 photoreceptor isolation between genotypes was similar with  $183 \pm 10.18$  (mean  $\pm$  SD) slices used from WT  
204 eyes, whereas  $201.3 \pm 8.91$  slices were used from double mutants ( $P = 0.19$ , Student's  $t$ -test).

205

## 206 **RNA isolation for RNA sequencing**

207

208 Total RNA was isolated using an RNeasy Micro kit (Qiagen Benelux, Venlo, The Netherlands), quantified with  
209 a Nanodrop (Isogen Life Science B.V., The Netherlands) and the quality was checked on a Bioanalyzer (Agilent  
210 Technologies, Amstelveen, The Netherlands). Sample RNA integrity (RIN) values for photoreceptors ranged  
211 from 7 to 9.8, except for 3 samples (RIN = 3.2, 4.1, 4.1). For RPE samples, RIN values ranged from 5 – 9.5.

212

## 213 **Library preparation and RNA sequencing**

214

215 We used the KAPA mRNA HyperPrep kit (Illumina Platforms). For generating libraries, we used one batch of  
216 20 ng of total photoreceptor ( $n = 8$ ) RNA and 30 ng for the other three batches ( $n = 24$ ) according to the  
217 manufacturer's protocol (Illumina Platforms). For generating libraries from RPE samples we used 20 ng of  
218 RNA. RPE samples with low RNA yield were pooled. RPE libraries were generated in three batches.

219

220 The presence of cDNA was confirmed using flash gels (cat No. 57032, Lonza, Rockland, ME, USA). Libraries  
221 were 50 bp single-end sequenced using the Illumina HiSeq 4000 platform.

222

## 223 **Bioinformatics**

224

225 The photoreceptor and RPE RNA-seq data were analyzed separately, but with the same software versions  
226 and parameter settings unless indicated otherwise. Raw sequencing data were subjected to quality control  
227 using FastQC (v.0.11.15), Picard Tools, and dupRadar [27]. All samples were of sufficient quality. Reads were  
228 trimmed for adapter sequences using Trimmomatic (v0.32) [28]. Trimmed reads were aligned to the mouse  
229 genome (Ensembl GRCm38.p6) using HISAT2 (v2.1.0) [29]. Gene level counts were obtained using HTSeq  
230 (v0.11) [30] with default parameters except `--stranded=reverse` and the mouse GTF from Ensembl (release  
231 93). Statistical analyses were performed using the edgeR [31] and limma R (v3.5.0)/Bioconductor (v3.7)  
232 packages [32]. Genes with more than 2 counts in 4 or more samples (photoreceptors) or in 3 or more samples  
233 (RPE) were retained. Count data were transformed to log<sub>2</sub>-counts per million (logCPM), normalized by  
234 applying the trimmed mean of M-values method and precision weighted using voom [33]. Pairwise  
235 differential expression between the conditions of interest was assessed using an empirical Bayes moderated  
236  $t$ -test within limma's linear model framework, including the precision weights estimated by voom. Both for

237 WT and *Per1*<sup>-/-</sup>*Per2*<sup>Brdm1</sup> a moderated F-test was used to determine which genes are differentially expressed  
238 between time-points. Resulting p-values were corrected for multiple testing using the Benjamini-Hochberg  
239 false discovery rate (FDR). An adjusted p-value < 0.05 was considered significant for photoreceptors. For the  
240 RPE an adjusted p-value of < 0.1 was considered significant. Additional gene annotation was retrieved from  
241 Ensembl (photoreceptors: release 94, RPE: release 98) using the biomaRt R/Bioconductor package. Gene  
242 ontology and pathway enrichment analysis was performed using g:Profiler [34]. We set all identified  
243 transcripts in our RNA-seq dataset as a reference background. We set an adjusted  $P < 0.05$  as a threshold for  
244 significantly enriched pathways using the g:SCS method to correct for multiple testing [34]. We investigated  
245 interactions between protein products of the list of potential POS phagocytosis candidate genes by STRING  
246 analysis [35]. The 57 candidate genes encode for 49 proteins represented as nodes in the STRING network  
247 analysis. By setting the threshold to 0.25, we found 32 edges in the STRING network. Non-interacting nodes  
248 were not shown.

249

## 250 **Statistics**

251

252 Data are represented as means  $\pm$  SEM. Plots were generated using GraphPad Prism (La Jolla, CA, USA),  
253 SigmaPlot (Systat Software, San Jose, CA, USA) or R (Bell Labs, Murray Hill, NJ, USA). Normality of distribution  
254 was tested using the Shapiro-Wilk test. In case of non-normal distribution, the analysis was performed using  
255 ANOVA on ranks. Circadian expression profiles were determined using non-linear regression fitting to the  
256 equation  $y = y_0 + c \cdot \cos [2\pi (t-\varphi)/24]$ , where  $y_0$  represents mesor,  $c$  amplitude and  $\varphi$  acrophase [36,37]. The  
257 function featured the following constraints:  $\varphi < 24$ ,  $\varphi > 0$  and  $c > 0$ . Gene expression profiles were considered  
258 to be rhythmic when significant fitting ( $P < 0.05$ ) was observed to the equation  $y = y_0 + c \cdot \cos [2\pi (t-\varphi)/24]$ .  
259 Further analyses, where indicated, were performed using 1-way or 2-way ANOVA analysis followed by Holm-  
260 Sidak's post hoc tests.

261

## 262 **Results**

263

### 264 **Peak of rod outer segment phagocytosis is blunted in the retinas of *Per1*<sup>-/-</sup> *Per2*<sup>Brdm1</sup> mice**

265

266 The phagocytosis of photoreceptor outer segments is a highly rhythmic process occurring in a daily peak. This  
267 process persists in constant darkness, suggesting that it is driven by the circadian clock [12,38]. We tested  
268 the hypothesis that intact clockwork is required to sustain a rhythm of POS phagocytosis in constant darkness  
269 (DD). To that end, we used the *Per1*<sup>-/-</sup> *Per2*<sup>Brdm1</sup> clock mutant mice which are behaviorally arrhythmic in DD  
270 [21].

271



272 We used age-matched (2 months old) wild-type and *Per1*<sup>-/-</sup> *Per2*<sup>Brdm1</sup> mice, harvested eye globes at 8 time  
273 points over 24 h and analyzed anti-rhodopsin-stained phagosomes in the RPE (Fig. 1a). We quantified POS  
274 phagosomes at various time-points under DD conditions (n= 3 animals per genotype and per time point). A  
275 2-way ANOVA analysis showed that the number of POS phagosomes was affected by genotype (WT versus  
276 *Per1*<sup>-/-</sup> *Per2*<sup>Brdm1</sup>,  $P < 0.001$ ), time ( $P < 0.001$ ) and an interaction between genotype and time ( $P < 0.001$ ). Post-  
277 hoc analysis showed that phagocytic activity was rhythmic in wild type mice only, with 3-4 times more  
278 phagosomes at time-point CT1 compared with baseline ( $P < 0.001$  for all time point comparisons) (Fig. 1b, c;  
279 also confirmed by 1-way ANOVA,  $F_{7,16} = 34.49$ ;  $P < 0.001$ ). In contrast, in *Per1*<sup>-/-</sup> *Per2*<sup>Brdm1</sup> mice, there was no  
280 obvious peak (1-way ANOVA,  $F_{7,16} = 2.35$ ;  $P = 0.075$ ). These results suggest that *Per1* and/or *Per2* is required  
281 for rhythmic POS phagocytosis.  
282

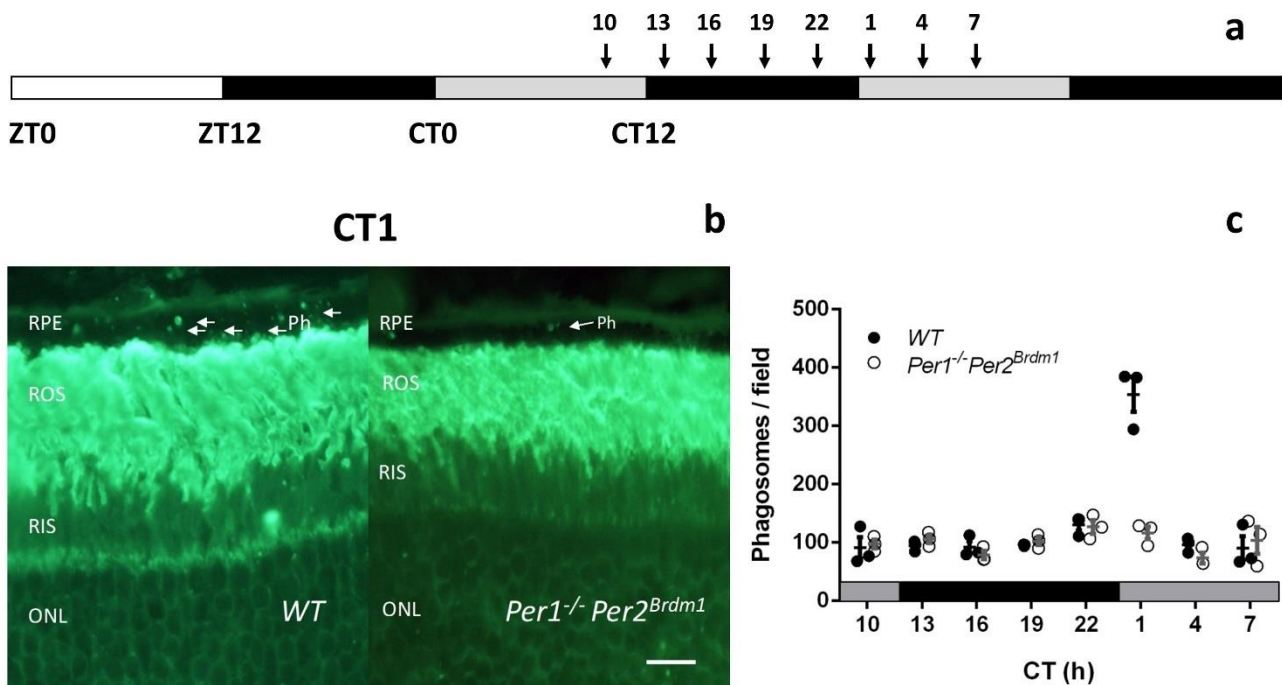

283  
284  
285 **Figure 1.** Mice lacking *Per1* and *Per2* show an impaired peak in POS phagocytosis. (a) WT and *Per1*<sup>-/-</sup> *Per2*<sup>Brdm1</sup>  
286 mice maintained under 12h light (white bar) - dark (black bar) conditions were placed under constant  
287 darkness (DD, grey - black bars) and sacrificed at time-points indicated by arrows. (b) Representative image  
288 of Rho-4D2 stained phagosomes of WT and *Per1*<sup>-/-</sup> *Per2*<sup>Brdm1</sup> retinas obtained at CT1 during the peak in  
289 phagocytosis in DD conditions. RPE – retinal pigment epithelium, ROS – rod outer segments, RIS – rod inner  
290 segments, ONL – outer nuclear layer, Ph – phagosomes. The scale bar is 10  $\mu$ m. (c) Quantification of  
291 phagosomes in WT and *Per1*<sup>-/-</sup> *Per2*<sup>Brdm1</sup> retinas under DD showed that *Per1*<sup>-/-</sup> *Per2*<sup>Brdm1</sup> mice had no detectable

292 peak in ROS phagocytosis. N = 3 / genotype / time-point. Graphs show mean  $\pm$  SEM and values from individual  
293 samples are shown as dots.

---

294

### 295 **Molecular makeup of the retinal clock in absence of *Per1* and *Per2***

296

297 Since the peak of phagocytosis is attenuated in the mutant mice in DD, we hypothesized that the molecular  
298 clockwork is impaired in *Per1*<sup>-/-</sup> *Per2*<sup>Brdm1</sup> retinas. To test this hypothesis, we sampled retinas from WT and  
299 *Per1*<sup>-/-</sup> *Per2*<sup>Brdm1</sup> mice every 4h over 24h under DD, and quantified relative mRNA levels of clock genes by qPCR  
300 (**Fig. 2a**). Rhythmicity in expression profiles was assessed by cosinor analysis. These changes over the 24h  
301 cycle were mainly confirmed by 1-way ANOVA analysis (**Table S2**). Under DD conditions we found rhythmic  
302 clock gene expression for *Bmal1*, *Per1*, *Per2*, *Rev-Erb $\alpha$*  and *Rorb* in WT whole retinas (**Fig. 2b, Table S2**).  
303 Unexpectedly, in DD conditions, we found that in *Per1*<sup>-/-</sup> *Per2*<sup>Brdm1</sup> mouse retinas also five clock genes were  
304 rhythmic: *Bmal1*, *Per3*, *Cry1*, *Cry2* and *Rev-Erb $\alpha$* . Therefore, in contrast to our hypothesis, these results  
305 suggest *Per1* and *Per2* mutations do not significantly impair the rhythmicity of whole retinas in mice.

306

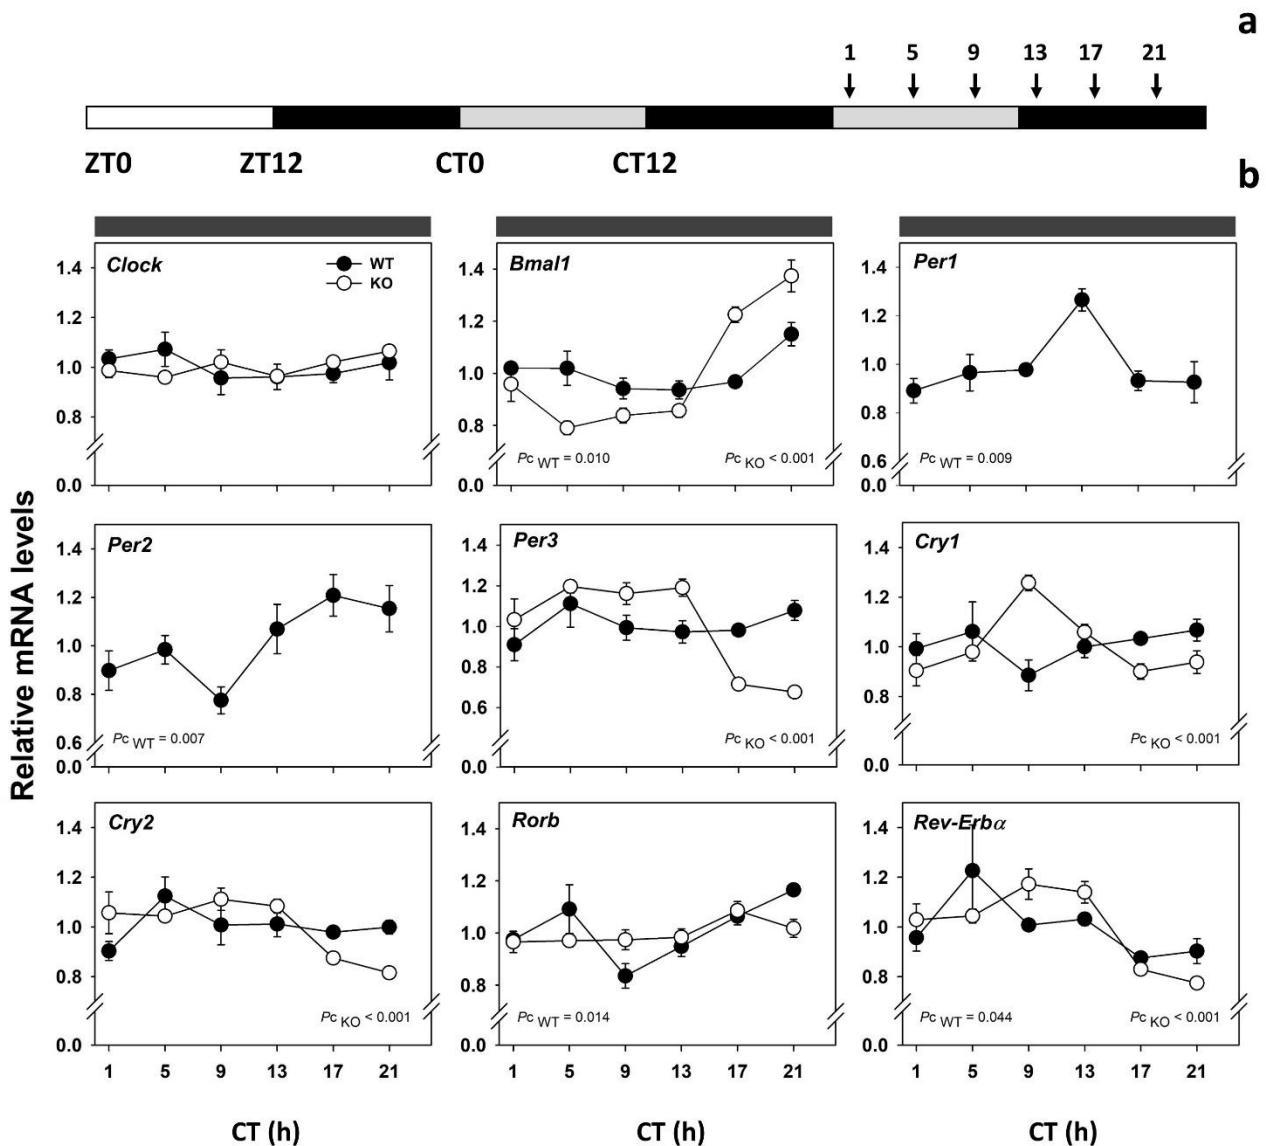

307

308

309 **Figure 2.** Clock gene expression profiles in WT (black dots) and *Per1*<sup>-/-</sup> *Per2*<sup>Brdm1</sup> (white dots; KO) whole retinas  
 310 under DD conditions. (a) Mice were placed under DD conditions, sacrificed at time-points indicated by arrows  
 311 and their whole retinas were harvested. (b) QPCR analysis revealed that rhythmic gene expression was  
 312 observed for *Bmal1*, *Per1*, *Per2*, *Rev-Erb $\alpha$*  and *Rorb* in WT retinas. Rhythmic expression was found for *Bmal1*,  
 313 *Per3*, *Cry1*, *Cry2* and *Rev-Erb $\alpha$*  in *Per1*<sup>-/-</sup> *Per2*<sup>Brdm1</sup> retinas. Values represent mean  $\pm$  SEM. Significant temporal  
 314 variations are indicated ( $P < 0.05$ ).  $P_c$  –  $P$ -value of cosinor non-linear regression fitting to the equation  $y = y_0$   
 315  $+ c \cdot \cos [2\pi (t-\Phi)/24]$ , with  $y_0$  – mesor,  $c$  – amplitude and  $\Phi$  – acrophase.  $N = 3-4$  for WT and 4-5 for double  
 316 mutants / time-point.

317

318 **Transcriptomics analysis of WT mouse RPE and photoreceptors**

319

320 To characterize the potential link between the circadian clock and the peak in POS phagocytosis, we first  
321 sought to characterize the time-affected transcriptomes of the RPE and photoreceptors. We harvested WT  
322 and *Per1*<sup>-/-</sup> *Per2*<sup>Brdm1</sup> mouse eyes kept in DD at 4 time-points (CT19, 22, 1 and 10) (**Fig. 3a**). We laser-capture-  
323 microdissected the RPE and photoreceptors from each mouse eye (n = 4 / genotype / time-point), extracted  
324 RNA and performed RNA sequencing. In the RPE and photoreceptors, respectively, a total of 24 382 and  
325 22 694 genes had sufficiently large counts to be retained in the statistical analysis. Next, we performed a  
326 pair-wise comparison of WT RPE and photoreceptor transcriptomes between consecutive time-points  
327 (**Fig. 3b** and **c**). In WT RPE, we found a large number of differentially expressed genes in comparisons between  
328 the expected peak in phagocytosis time-point CT1 and adjacent time-points (CT22 and CT10, respectively,  
329 **Fig. 3b**). In WT photoreceptors, most genes are differentially expressed in comparisons between CT10 and  
330 adjacent time points (CT1 and CT19, respectively, **Fig. 3c**). By contrast, in all pair-wise comparisons we found  
331 that only 3 genes differed significantly between time-points (i.e. were up-regulated at CT10 vs 19) in  
332 *Per1*<sup>-/-</sup> *Per2*<sup>Brdm1</sup> RPE. We found that 1 gene was down-regulated at CT19 vs CT10 in *Per1*<sup>-/-</sup> *Per2*<sup>Brdm1</sup>  
333 photoreceptors. Thus, these results suggest that the transcriptional program for initiating POS phagocytosis  
334 is likely in the RPE and not photoreceptors.

335

336 Our differential expression analysis showed that 594 genes in WT RPE (=2.44% of all genes retained in the  
337 analysis) and 2 372 genes in WT photoreceptors (=10.45% of retained genes) varied over time-points (**Fig. 3d**,  
338 **Table S3, S4**). Among them are components of the circadian clock network (**Table S3, S4**). Pathway analysis  
339 of time-affected genes in WT mice RPE revealed that, in addition to circadian pathways, phototransduction  
340 and metabolic-related pathways were functionally enriched (**Table S5**). Time-affected WT photoreceptor  
341 genes were enriched in circadian, metabolic, neurotransmission and DNA repair-related pathways (**Table S6**).  
342 Interestingly, 119 time-affected genes overlap in RPE and photoreceptors (**Table S7**), and are functionally  
343 enriched in glucose metabolism and neurotransmitter release-related pathways (**Fig. 3e, Table S8**). We also  
344 found that, respectively, 32 and 48 time-affected genes in the RPE and photoreceptors overlap with the  
345 RetNet list of eye disease-related genes [39] (**Fig. 3d, Table S9**). Thus, our results show that in the RPE and  
346 photoreceptors, a large number of genes and pathways vary in a time-dependent manner, a number of which  
347 are implicated in eye diseases.

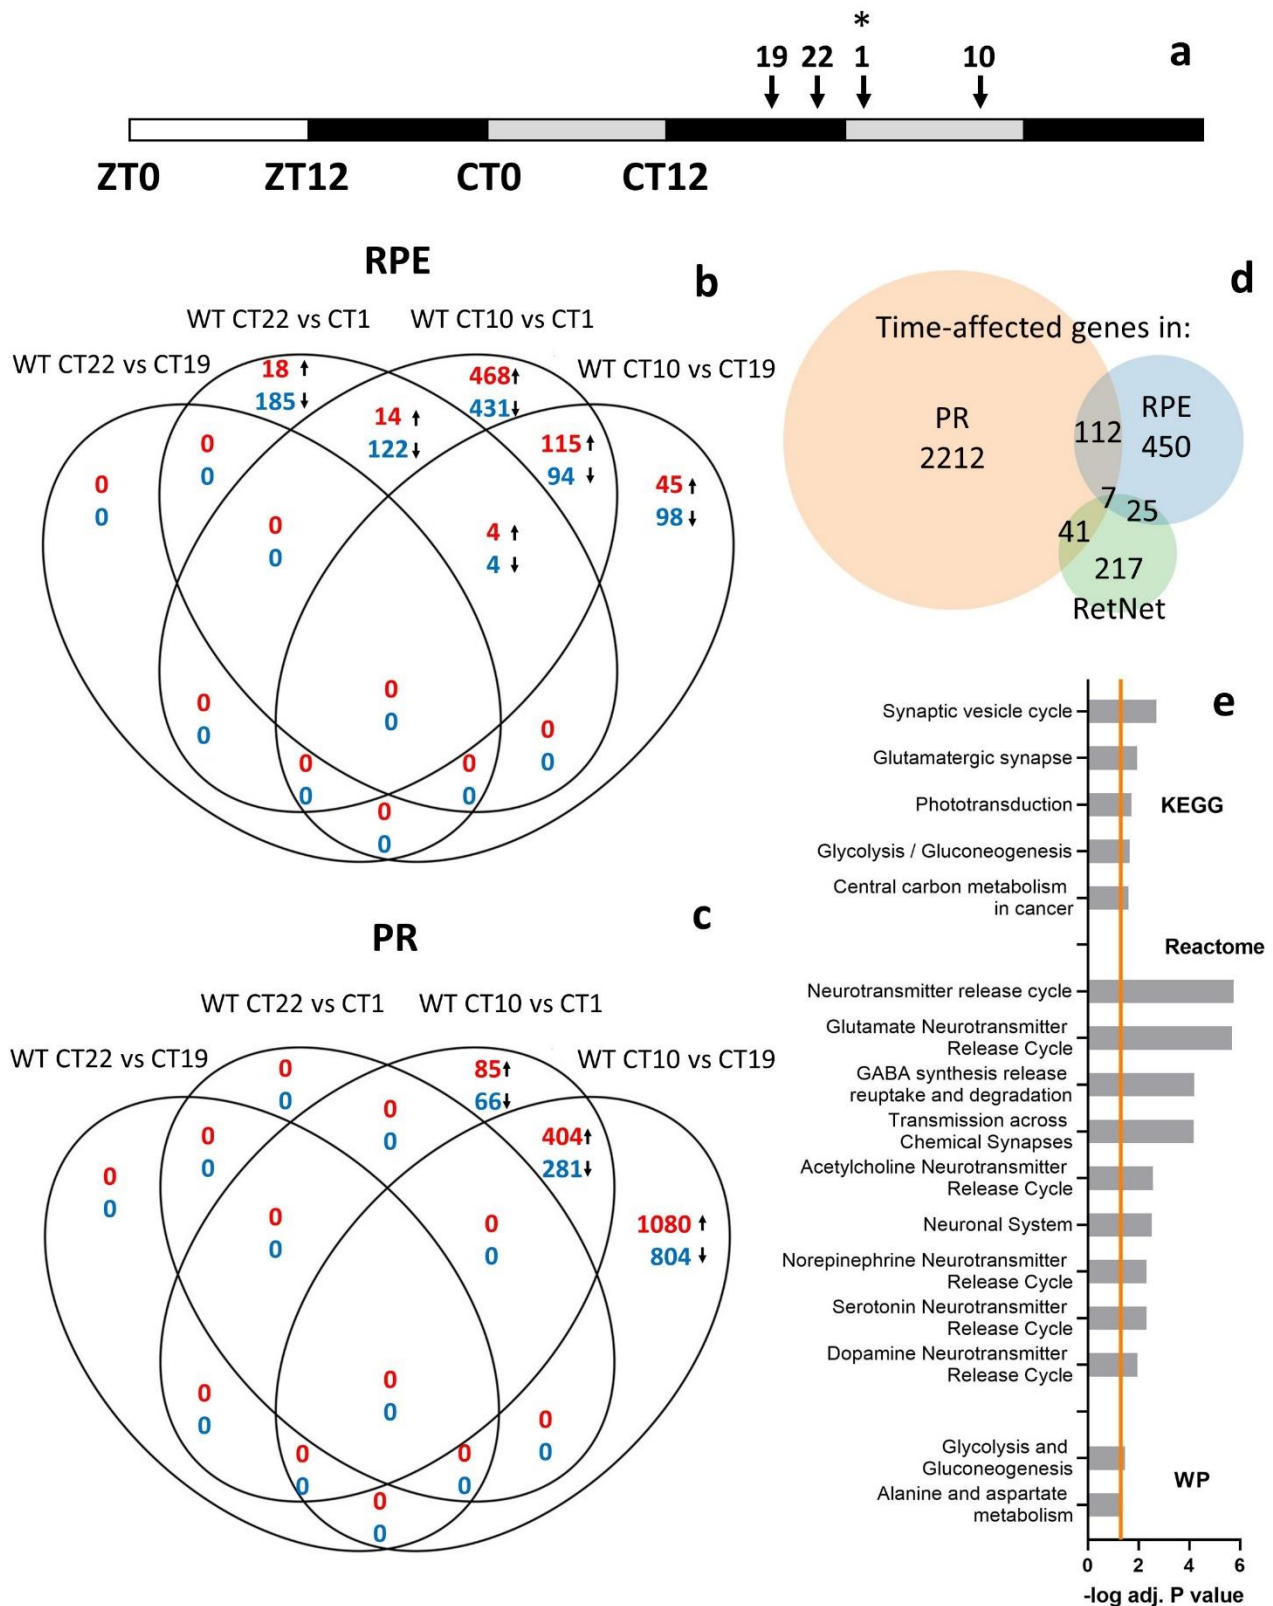

348

349

350 **Figure 3.** Transcriptional profiling of WT mouse RPE and photoreceptors. (a) Eyes were obtained under DD  
 351 conditions from 4 successive time-points: before (CT19, CT22), during (CT1) and after (CT10) the expected  
 352 peak in POS phagocytosis (n = 4 / time-point). RPE and photoreceptors were meticulously laser-capture-

353 microdissected from each mouse eye, RNA was extracted and the transcriptomes were determined using  
354 RNA-sequencing. (b) In the RPE, a substantial number of genes were differentially expressed at time-points  
355 adjacent to the peak in POS phagocytosis – CT1. (c) By contrast, in photoreceptors (PR) most differential gene  
356 expression occurs around CT10. Red numbers represent the number of up-regulated differentially expressed  
357 genes, whereas blue ones are down-regulated. (d) A substantial number of identified transcripts showed a  
358 time effect in WT PR and RPE. There is considerable overlap (n=119) between time affected genes in these  
359 two tissues, a number of which overlap with the RetNet list of eye disease-related genes [39]. (e) Functional  
360 annotation (performed using g:Profiler) revealed that overlapping time-affected genes in RPE and PR are  
361 enriched in glucose metabolism and neurotransmission-related pathways. The orange line represents the  
362 significance level cut-off (adjusted  $P < 0.05$ ). WikiPathways, Reactome and KEGG are databases of biological  
363 pathways.

---

364

### 365 **Potential molecular pathway that initiates POS phagocytosis**

366

367 Our results suggested that the transcriptional events in the RPE might initiate POS phagocytosis (**Fig. 3b**). Our  
368 results also suggested that *Per1* and/or *Per2* are necessary for driving the peak in POS phagocytosis under  
369 DD (**Fig. 1**), but the molecular link is unclear. To characterize this link, we performed pair-wise comparisons  
370 between WT and *Per1*<sup>-/-</sup> *Per2*<sup>Brdm1</sup> RPE transcriptomes. We found a substantial number of genes that were  
371 differentially expressed in *Per1*<sup>-/-</sup> *Per2*<sup>Brdm1</sup> RPE compared to WT ones at the peak POS phagocytosis time-  
372 point CT1 (**Fig. 4a**). Next, we defined selection criteria for genes that potentially initiate POS phagocytosis  
373 (**Fig. 4b**). Considering that the peak in POS phagocytosis is lacking in *Per1*<sup>-/-</sup> *Per2*<sup>Brdm1</sup> mice, we assumed that  
374 the genes that initiate POS phagocytosis are down-regulated in double mutant RPE compared to WT ones at  
375 CT1. POS phagocytosis occurs as a peak in WT mice on a molecular and functional level [40,41]. Thus, we  
376 selected genes that are both up-regulated at CT1 vs CT22 and down-regulated at CT10 vs CT1 in WT RPE. We  
377 removed possible photoreceptor “contaminants” from this list by using mouse signature cone and rod genes  
378 [42] and the Gene Ontology database (POS cellular component, GO:0001750). Using this strategy, we  
379 obtained a list of 57 candidate genes (**Fig. 4b, Table S10**). These genes are functionally enriched in  
380 neurotransmission related pathways (**Fig 4c, Table S11**). To reveal the interactions that protein products of  
381 these genes are involved in, we constructed a protein-protein interaction network using STRING [35] (**Fig.**  
382 **4d**). Our list revealed a number of functional associations in which the protein products of candidate genes  
383 are involved in, most of which are associated with the term cell junction (highlighted in red in **Fig. 4d**). This  
384 cluster involves the interactions of *Syp*, *Gnaz*, *Pacsin1*, *Snap91*, *Camk2d* and *Camk2b* as identified in our  
385 STRING analysis. Thus, it is possible that POS phagocytosis might be initiated by the largest cluster identified  
386 in this analysis.

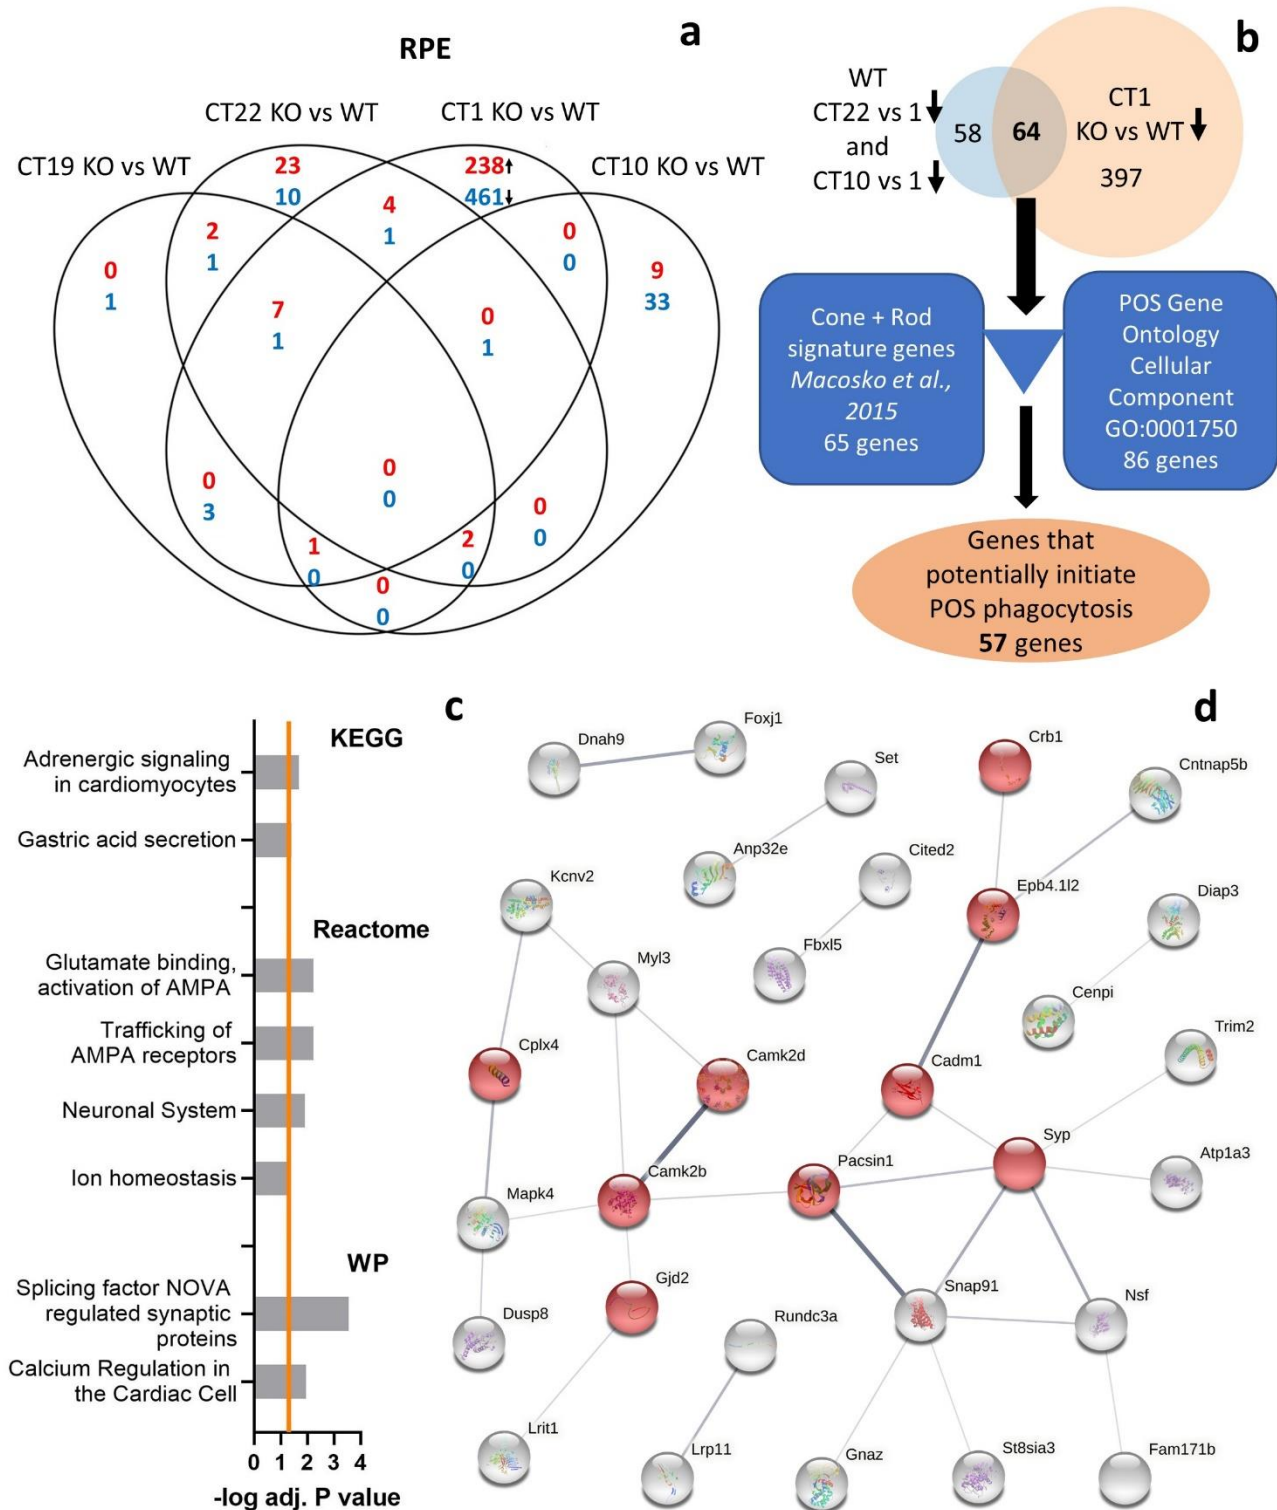

387

388 **Figure 4.** Identification of potential phagocytic pathways in RPE. (a) A comparison of WT and *Per1*<sup>-/-</sup> *Per2*<sup>Brdm1</sup>  
389 (KO) RPE transcriptomes within each time-point revealed that most genes were differentially expressed  
390 during the peak phagocytosis time point - CT1. Red numbers represent the number of up-regulated  
391 differentially expressed genes, whereas blue ones are down-regulated. (b) Selection strategy for compiling  
392 the list of genes in the RPE possibly implicated in regulating POS phagocytosis. Signature rod and cone genes

393 [42] and the Gene Ontology term “Photoreceptor Outer Segment” were used to remove photoreceptor  
394 genes from the list of genes that potentially regulate POS phagocytosis. (c) Functional enrichment analysis  
395 using g:Profiler showed that these genes are enriched in neurotransmission related pathways from the  
396 WikiPathways (WP), Reactome, KEGG databases. The orange line represents the significance cut-off (adjusted  
397  $P < 0.05$ ). (d) STRING network analysis of protein functional associations of products of RPE genes implicated  
398 in initiating phagocytosis. Nodes represent protein products (n=57). Disconnected nodes are not shown.  
399 Edges represent protein functional associations. Interaction confidence scores range 0.25 - 0.99.

---

400

## 401 **Discussion**

402

403 In the present study, we found no peak in POS phagocytosis in retinas of mice carrying a combined *Per1* and  
404 *Per2* mutation under constant darkness. Unexpectedly, gene expression analysis revealed that mutant  
405 retinas remained rhythmic under constant darkness, in contrast to mutant RPE and photoreceptors which  
406 showed no temporal variation. Using the purest possible RPE and photoreceptor sample material obtained  
407 by microdissection, we found significant differential gene expression in WT RPE at the peak phagocytosis  
408 time-point, but not in photoreceptors. Our results suggest a network of genes that potentially initiates POS  
409 phagocytosis in the RPE. These data challenge the view that molecular events in photoreceptors drive POS  
410 phagocytosis (via expression of phosphatidylserine “eat-me” signals) [18].

411

412 Retinal clocks are present in virtually all retinal layers [43-45,4] and are tightly coupled [4]. Coupling between  
413 retinal clocks contributes towards the precise timing of physiology within the retina [46]. In our study in  
414 *Per1*<sup>-/-</sup> *Per2*<sup>Brdm1</sup> mice, constant darkness prevented any increased phagocytosis following subjective onset of  
415 day, a process known to be clock-regulated [12,47-50]. Thus, we speculated that constant darkness might  
416 impair the clockwork in *Per1*<sup>-/-</sup> *Per2*<sup>Brdm1</sup> whole retinas. The literature is not consistent regarding the effects of  
417 lighting conditions on clock gene expression in the whole retina. Studies either report no effects of DD on  
418 global retinal oscillations [45,51] or suggest that DD conditions dampen retinal rhythmicity [52,53,37].  
419 Unexpectedly, our qPCR study revealed that clock gene expression remained rhythmic in both WT and  
420 *Per1*<sup>-/-</sup> *Per2*<sup>Brdm1</sup> whole retinas. The origin of rhythmicity in mutant whole retinas is not known. It is most likely  
421 not due to input from the central clock, because retinal clocks are known to be independent from the SCN  
422 [3] and the SCN is considered arrhythmic based on locomotor activity of *Per1*<sup>-/-</sup> *Per2*<sup>Brdm1</sup> mice in DD [21]. The  
423 source is most likely not in photoreceptors because in this study transcriptomics analysis of LCM-isolated  
424 *Per1*<sup>-/-</sup> *Per2*<sup>Brdm1</sup> photoreceptors showed no temporal variations. Therefore, it is likely that rhythms in mutant  
425 whole retinas originate from retinal layers which display the most robust rhythms: e.g. the inner retina  
426 [4,43,44,51,37]. Considering that the number of oscillating genes differs considerably across mouse



427 organs/tissues [54], it is possible that *Per1* and/or *Per2* mutations impact the RPE and photoreceptor clocks  
428 disproportionately more than the clockwork of other retinal cells. Regardless of the reasons, these results  
429 suggest that (global) retinal rhythmicity is not sufficient for driving the peak of POS phagocytosis.

430

431 The phagocytosis of POS is a rhythmic process occurring roughly one-hour after light onset [12,47-50]. This  
432 process is critical for retinal health as demonstrated by retinal degeneration displayed in both human  
433 patients [16] and animal models [55,15,56]. Some literature stresses the importance of precise timing of POS  
434 phagocytosis in maintaining retinal health [55,56]. This view is corroborated by our finding that a number of  
435 eye disease-related genes vary across time-points in the RPE and photoreceptors. However, it was recently  
436 reported that dopamine D2 receptor knockout mice had no peak in POS phagocytosis and displayed no  
437 apparent retinal pathologies [57]. Regardless, the molecular pathways responsible for driving this peak are  
438 not known [5,17,18]. By using immunohistochemistry and quantifying ingested POS in clock mutant mouse  
439 retinas we showed that *Per1* and/or *Per2* are necessary (molecular clock) components for the transient surge  
440 in POS phagocytosis.

441

442 The prevailing view is that POS phagocytosis is initiated by the externalization of phosphatidylserine “eat-me”  
443 signals on the POS membrane [17,18]. However, we found that microdissected WT photoreceptors did not  
444 differ in gene expression 3h or 6h before the peak in POS phagocytosis. By contrast, in WT RPE, we found  
445 that a number of genes were differentially expressed at the phagocytic peak time-point compared to the 3h  
446 earlier one. In addition, at the peak phagocytosis time-point, we found a vast number of differentially  
447 expressed genes in *Per1*<sup>-/-</sup> *Per2*<sup>Brdm1</sup> RPE compared to WT ones. These results suggest that POS phagocytosis  
448 is initiated by the RPE. This possibility is indeed plausible because the RPE was shown to display sustained  
449 rhythms in various models: in vivo [57-61]; ex vivo [62-64] and in cell culture models [64-68]. Importantly,  
450 the phagocytic machinery is rhythmic in these cells [57,67,41,64]. Furthermore, in an arrhythmic BMAL1  
451 knockout cell culture model there was no rhythm of phagocytic activity [67].

452

453 Finally, we proposed a network of genes for regulating ROS phagocytosis in the RPE. The candidate genes in  
454 this list are enriched in the ion homeostasis pathway. This is expected as previous studies implicated ion  
455 channels in POS phagocytosis such as voltage gated sodium channels [69] and the L-type calcium channel  
456 Ca<sub>v</sub>1.3 [55]. The list also contains known genes implicated in POS phagocytosis such as *Mfge8* [70] and *MyI3*  
457 [71]. Cell junctions were also enriched in the candidate gene list, among which *Gjd2* encodes for a gap  
458 junction protein. It is possible that increased gap junction expression enhances the connectivity of the RPE  
459 at the peak phagocytic time-point. That might, in turn, lead to a synchronized and sharp phagocytic peak  
460 across the whole RPE. However, it should also be noted that a number of genes in the list have not been

461 sufficiently characterized e.g. *Gm13112*, *Gm13735*, *Gm16701*, etc. Therefore, our list of candidate genes  
462 provides ample opportunities for investigation for the research community.

463

464 The strength of this approach is the use of the purest possible sample material obtained from LCM. In  
465 addition, we considered the rhythmic nature of POS phagocytosis by using samples from multiple time points.  
466 We also compared our results with an arrhythmic mouse model that lacked this peak phagocytic activity.  
467 There are some limitations in our approach. For example, the genes implicated in initiating phagocytosis  
468 might not be down-regulated after the peak phagocytic time-point. It might be that at the peak phagocytic  
469 time-points, the down-regulated genes repress RPE phagocytic activity. It is also possible that genes in the  
470 list might be “contaminants” originating from POS fragments that are ingested by the RPE. Despite the  
471 imperfections, this list will be a valuable tool for studying the POS phagocytosis pathway.

472

473 In conclusion, our study reveals that *Per1* / *Per2* are necessary circadian clock components for driving the  
474 rhythm of POS phagocytosis. Our results show that *Per1* and *Per2* mutation does not impair the rhythmicity  
475 of the whole retina. Our data suggests that the molecular pathways that initiate POS phagocytosis are most  
476 likely initiated by the RPE by genes functionally enriched in neurotransmission related pathways.

477

#### 478 **Acknowledgements**

479

480 We thank Anneloor L.M.A. ten Asbroek and Nguyen-Vy Vo for technical assistance. We thank Dr. D. Sage, Dr.  
481 S. Reibel and N. Lethenet from the Chronobiotron (UMS 3415) for animal care and Dr. U. Albrecht (University  
482 of Freiburg) for the *Per1*<sup>-/-</sup>*Per2*<sup>Brdm1</sup> mice. This project has been funded with support from the NeuroTime  
483 Erasmus+ grant (European Union), Rotterdamse Stichting Blindenbelangen (Netherlands), Nelly Reef fund  
484 (Netherlands), Stichting voor Ooglijders (Netherlands), Stichting tot Verbetering van het Lot der Blinden  
485 (Netherlands) and Retina France (France).

486

#### 487 **References**

488

- 489 1. Stratmann M, Schibler U (2006) Properties, entrainment, and physiological functions of mammalian  
490 peripheral oscillators. *Journal of biological rhythms* 21 (6):494-506. doi:10.1177/0748730406293889
- 491 2. Ko CH, Takahashi JS (2006) Molecular components of the mammalian circadian clock. *Human molecular*  
492 *genetics* 15 Spec No 2:R271-277. doi:10.1093/hmg/ddl207
- 493 3. Terman JS, Reme CE, Terman M (1993) Rod outer segment disk shedding in rats with lesions of the  
494 suprachiasmatic nucleus. *Brain research* 605 (2):256-264. doi:10.1016/0006-8993(93)91748-h

- 495 4. Jaeger C, Sandu C, Malan A, Mellac K, Hicks D, Felder-Schmittbuhl MP (2015) Circadian organization of the  
496 rodent retina involves strongly coupled, layer-specific oscillators. *FASEB journal : official publication of the*  
497 *Federation of American Societies for Experimental Biology* 29 (4):1493-1504. doi:10.1096/fj.14-261214
- 498 5. McMahon DG, Iuvone PM, Tosini G (2014) Circadian organization of the mammalian retina: from gene  
499 regulation to physiology and diseases. *Progress in retinal and eye research* 39:58-76.  
500 doi:10.1016/j.preteyeres.2013.12.001
- 501 6. Besharse JC, Iuvone PM (1983) Circadian clock in *Xenopus* eye controlling retinal serotonin N-  
502 acetyltransferase. *Nature* 305 (5930):133-135. doi:10.1038/305133a0
- 503 7. Tosini G, Menaker M (1996) Circadian rhythms in cultured mammalian retina. *Science (New York, NY)* 272  
504 (5260):419-421. doi:10.1126/science.272.5260.419
- 505 8. Ribelayga C, Cao Y, Mangel SC (2008) The circadian clock in the retina controls rod-cone coupling. *Neuron*  
506 59 (5):790-801. doi:10.1016/j.neuron.2008.07.017
- 507 9. Ribelayga C, Mangel SC (2010) Identification of a circadian clock-controlled neural pathway in the rabbit  
508 retina. *PLoS one* 5 (6):e11020. doi:10.1371/journal.pone.0011020
- 509 10. Bassi CJ, Powers MK (1986) Daily fluctuations in the detectability of dim lights by humans. *Physiology &*  
510 *behavior* 38 (6):871-877. doi:10.1016/0031-9384(86)90056-9
- 511 11. Barnard AR, Hattar S, Hankins MW, Lucas RJ (2006) Melanopsin regulates visual processing in the mouse  
512 retina. *Current biology : CB* 16 (4):389-395. doi:10.1016/j.cub.2005.12.045
- 513 12. LaVail MM (1976) Rod outer segment disk shedding in rat retina: relationship to cyclic lighting. *Science*  
514 (New York, NY) 194 (4269):1071-1074. doi:10.1126/science.982063
- 515 13. Ko GY (2018) Circadian regulation in the retina: From molecules to network. *The European journal of*  
516 *neuroscience*. doi:10.1111/ejn.14185
- 517 14. Kevany BM, Palczewski K (2010) Phagocytosis of retinal rod and cone photoreceptors. *Physiology*  
518 (Bethesda, Md) 25 (1):8-15. doi:10.1152/physiol.00038.2009
- 519 15. D'Cruz PM, Yasumura D, Weir J, Matthes MT, Abderrahim H, LaVail MM, Vollrath D (2000) Mutation of  
520 the receptor tyrosine kinase gene *Mertk* in the retinal dystrophic RCS rat. *Human molecular genetics* 9  
521 (4):645-651. doi:10.1093/hmg/9.4.645
- 522 16. Gal A, Li Y, Thompson DA, Weir J, Orth U, Jacobson SG, Apfelstedt-Sylla E, Vollrath D (2000) Mutations in  
523 *MERTK*, the human orthologue of the RCS rat retinal dystrophy gene, cause retinitis pigmentosa. *Nature*  
524 *genetics* 26 (3):270-271. doi:10.1038/81555
- 525 17. Mazzoni F, Safa H, Finnemann SC (2014) Understanding photoreceptor outer segment phagocytosis: use  
526 and utility of RPE cells in culture. *Experimental eye research* 126:51-60. doi:10.1016/j.exer.2014.01.010
- 527 18. Müller C, Finnemann SC (2020) RPE Phagocytosis. In: Klettner AK, Dithmar S (eds) *Retinal Pigment*  
528 *Epithelium in Health and Disease*. Springer International Publishing, Cham, pp 47-63. doi:10.1007/978-3-030-  
529 28384-1\_3

- 530 19. Bobu C, Craft CM, Masson-Pevet M, Hicks D (2006) Photoreceptor organization and rhythmic  
531 phagocytosis in the Nile rat *Arvicanthis ansorgei*: a novel diurnal rodent model for the study of cone  
532 pathophysiology. *Investigative ophthalmology & visual science* 47 (7):3109-3118. doi:10.1167/iovs.05-1397
- 533 20. Krigel A, Felder-Schmittbuhl MP, Hicks D (2010) Circadian-clock driven cone-like photoreceptor  
534 phagocytosis in the neural retina leucine zipper gene knockout mouse. *Molecular vision* 16:2873-2881
- 535 21. Zheng B, Albrecht U, Kaasik K, Sage M, Lu W, Vaishnav S, Li Q, Sun ZS, Eichele G, Bradley A, Lee CC (2001)  
536 Nonredundant roles of the *mPer1* and *mPer2* genes in the mammalian circadian clock. *Cell* 105 (5):683-694.  
537 doi:10.1016/s0092-8674(01)00380-4
- 538 22. Zheng B, Larkin DW, Albrecht U, Sun ZS, Sage M, Eichele G, Lee CC, Bradley A (1999) The *mPer2* gene  
539 encodes a functional component of the mammalian circadian clock. *Nature* 400 (6740):169-173.  
540 doi:10.1038/22118
- 541 23. Albrecht U, Zheng B, Larkin D, Sun ZS, Lee CC (2001) *MPer1* and *mper2* are essential for normal resetting  
542 of the circadian clock. *Journal of biological rhythms* 16 (2):100-104. doi:10.1177/074873001129001791
- 543 24. Hicks D, Molday RS (1985) Localization of lectin receptors on bovine photoreceptor cells using dextran-  
544 gold markers. *Investigative ophthalmology & visual science* 26 (7):1002-1013
- 545 25. Hellemans J, Mortier G, De Paep A, Speleman F, Vandesompele J (2007) qBase relative quantification  
546 framework and software for management and automated analysis of real-time quantitative PCR data.  
547 *Genome biology* 8 (2):R19. doi:10.1186/gb-2007-8-2-r19
- 548 26. Hiragaki S, Baba K, Coulson E, Kunst S, Spessert R, Tosini G (2014) Melatonin signaling modulates clock  
549 genes expression in the mouse retina. *PloS one* 9 (9):e106819. doi:10.1371/journal.pone.0106819
- 550 27. Sayols S, Scherzinger D, Klein H (2016) dupRadar: a Bioconductor package for the assessment of PCR  
551 artifacts in RNA-Seq data. *BMC bioinformatics* 17 (1):428. doi:10.1186/s12859-016-1276-2
- 552 28. Bolger AM, Lohse M, Usadel B (2014) Trimmomatic: a flexible trimmer for Illumina sequence data.  
553 *Bioinformatics (Oxford, England)* 30 (15):2114-2120. doi:10.1093/bioinformatics/btu170
- 554 29. Kim D, Langmead B, Salzberg SL (2015) HISAT: a fast spliced aligner with low memory requirements.  
555 *Nature methods* 12 (4):357-360. doi:10.1038/nmeth.3317
- 556 30. Anders S, Pyl PT, Huber W (2015) HTSeq—a Python framework to work with high-throughput sequencing  
557 data. *Bioinformatics (Oxford, England)* 31 (2):166-169. doi:10.1093/bioinformatics/btu638
- 558 31. Robinson MD, McCarthy DJ, Smyth GK (2010) edgeR: a Bioconductor package for differential expression  
559 analysis of digital gene expression data. *Bioinformatics (Oxford, England)* 26 (1):139-140.  
560 doi:10.1093/bioinformatics/btp616
- 561 32. Ritchie ME, Phipson B, Wu D, Hu Y, Law CW, Shi W, Smyth GK (2015) limma powers differential expression  
562 analyses for RNA-sequencing and microarray studies. *Nucleic acids research* 43 (7):e47.  
563 doi:10.1093/nar/gkv007
- 564 33. Law CW, Chen Y, Shi W, Smyth GK (2014) voom: Precision weights unlock linear model analysis tools for  
565 RNA-seq read counts. *Genome biology* 15 (2):R29. doi:10.1186/gb-2014-15-2-r29

- 566 34. Reimand J, Kull M, Peterson H, Hansen J, Vilo J (2007) g:Profiler--a web-based toolset for functional  
567 profiling of gene lists from large-scale experiments. *Nucleic acids research* 35 (Web Server issue):W193-200.  
568 doi:10.1093/nar/gkm226
- 569 35. Szklarczyk D, Franceschini A, Wyder S, Forslund K, Heller D, Huerta-Cepas J, Simonovic M, Roth A, Santos  
570 A, Tsafou KP, Kuhn M, Bork P, Jensen LJ, von Mering C (2015) STRING v10: protein-protein interaction  
571 networks, integrated over the tree of life. *Nucleic acids research* 43 (Database issue):D447-452.  
572 doi:10.1093/nar/gku1003
- 573 36. Nelson W, Tong YL, Lee JK, Halberg F (1979) Methods for cosinor-rhythmometry. *Chronobiologia* 6  
574 (4):305-323
- 575 37. Sandu C, Hicks D, Felder-Schmittbuhl MP (2011) Rat photoreceptor circadian oscillator strongly relies on  
576 lighting conditions. *The European journal of neuroscience* 34 (3):507-516. doi:10.1111/j.1460-  
577 9568.2011.07772.x
- 578 38. Bobu C, Hicks D (2009) Regulation of retinal photoreceptor phagocytosis in a diurnal mammal by circadian  
579 clocks and ambient lighting. *Investigative ophthalmology & visual science* 50 (7):3495-3502.  
580 doi:10.1167/iovs.08-3145
- 581 39. SP Daiger BR, J Greenberg, A Christoffels, W Hide (1998) RetNet, the Retinal Information Network.  
582 University of Texas-Houston Health Science Center. <https://sph.uth.edu/RetNet/>. 2020
- 583 40. Law AL, Parinot C, Chatagnon J, Gravez B, Sahel JA, Bhattacharya SS, Nandrot EF (2015) Cleavage of Mer  
584 tyrosine kinase (MerTK) from the cell surface contributes to the regulation of retinal phagocytosis. *The*  
585 *Journal of biological chemistry* 290 (8):4941-4952. doi:10.1074/jbc.M114.628297
- 586 41. Nandrot EF, Kim Y, Brodie SE, Huang X, Sheppard D, Finnemann SC (2004) Loss of synchronized retinal  
587 phagocytosis and age-related blindness in mice lacking alphavbeta5 integrin. *The Journal of experimental*  
588 *medicine* 200 (12):1539-1545. doi:10.1084/jem.20041447
- 589 42. Macosko EZ, Basu A, Satija R, Nemesh J, Shekhar K, Goldman M, Tirosh I, Bialas AR, Kamitaki N,  
590 Martersteck EM, Trombetta JJ, Weitz DA, Sanes JR, Shalek AK, Regev A, McCarroll SA (2015) Highly Parallel  
591 Genome-wide Expression Profiling of Individual Cells Using Nanoliter Droplets. *Cell* 161 (5):1202-1214.  
592 doi:10.1016/j.cell.2015.05.002
- 593 43. Ruan GX, Zhang DQ, Zhou T, Yamazaki S, McMahon DG (2006) Circadian organization of the mammalian  
594 retina. *Proceedings of the National Academy of Sciences of the United States of America* 103 (25):9703-9708.  
595 doi:10.1073/pnas.0601940103
- 596 44. Ruan GX, Allen GC, Yamazaki S, McMahon DG (2008) An autonomous circadian clock in the inner mouse  
597 retina regulated by dopamine and GABA. *PLoS biology* 6 (10):e249. doi:10.1371/journal.pbio.0060249
- 598 45. Liu X, Zhang Z, Ribelayga CP (2012) Heterogeneous expression of the core circadian clock proteins among  
599 neuronal cell types in mouse retina. *PloS one* 7 (11):e50602. doi:10.1371/journal.pone.0050602
- 600 46. Felder-Schmittbuhl MP, Buhr ED, Dkhissi-Benyahya O, Hicks D, Peirson SN, Ribelayga CP, Sandu C,  
601 Spessert R, Tosini G (2018) Ocular Clocks: Adapting Mechanisms for Eye Functions and Health. *Investigative*  
602 *ophthalmology & visual science* 59 (12):4856-4870. doi:10.1167/iovs.18-24957

- 603 47. LaVail MM (1980) Circadian nature of rod outer segment disc shedding in the rat. Investigative  
604 ophthalmology & visual science 19 (4):407-411
- 605 48. Young RW (1971) The renewal of rod and cone outer segments in the rhesus monkey. The Journal of cell  
606 biology 49 (2):303-318
- 607 49. Young RW (1978) The daily rhythm of shedding and degradation of rod and cone outer segment  
608 membranes in the chick retina. Investigative ophthalmology & visual science 17 (2):105-116
- 609 50. Fisher SK, Pfeffer BA, Anderson DH (1983) Both rod and cone disc shedding are related to light onset in  
610 the cat. Investigative ophthalmology & visual science 24 (7):844-856
- 611 51. Zhang DQ, Zhou T, Ruan GX, McMahon DG (2005) Circadian rhythm of Period1 clock gene expression in  
612 NOS amacrine cells of the mouse retina. Brain research 1050 (1-2):101-109.  
613 doi:10.1016/j.brainres.2005.05.042
- 614 52. Storch KF, Paz C, Signorovitch J, Raviola E, Pawlyk B, Li T, Weitz CJ (2007) Intrinsic circadian clock of the  
615 mammalian retina: importance for retinal processing of visual information. Cell 130 (4):730-741.  
616 doi:10.1016/j.cell.2007.06.045
- 617 53. Bobu C, Sandu C, Laurent V, Felder-Schmittbuhl MP, Hicks D (2013) Prolonged light exposure induces  
618 widespread phase shifting in the circadian clock and visual pigment gene expression of the Arvicantis  
619 ansorgei retina. Molecular vision 19:1060-1073
- 620 54. Zhang R, Lahens NF, Ballance HI, Hughes ME, Hogenesch JB (2014) A circadian gene expression atlas in  
621 mammals: implications for biology and medicine. Proceedings of the National Academy of Sciences of the  
622 United States of America 111 (45):16219-16224. doi:10.1073/pnas.1408886111
- 623 55. Müller C, Mas Gomez N, Ruth P, Strauss O (2014) CaV1.3 L-type channels, maxiK Ca(2+)-dependent K(+)  
624 channels and bestrophin-1 regulate rhythmic photoreceptor outer segment phagocytosis by retinal pigment  
625 epithelial cells. Cellular signalling 26 (5):968-978. doi:10.1016/j.cellsig.2013.12.021
- 626 56. Laurent V, Sengupta A, Sanchez-Bretano A, Hicks D, Tosini G (2017) Melatonin signaling affects the timing  
627 in the daily rhythm of phagocytic activity by the retinal pigment epithelium. Experimental eye research  
628 165:90-95. doi:10.1016/j.exer.2017.09.007
- 629 57. Goyal V, DeVera C, Laurent V, Sellers J, Chrenek MA, Hicks D, Baba K, Iuvone PM, Tosini G (2020)  
630 Dopamine 2 Receptor Signaling Controls the Daily Burst in Phagocytic Activity in the Mouse Retinal Pigment  
631 Epithelium. Investigative ophthalmology & visual science 61 (5):10. doi:10.1167/iovs.61.5.10
- 632 58. Louer EMM, Yi G, Carmone C, Robben J, Stunnenberg HG, den Hollander AI, Deen PMT (2020) Genes  
633 Involved in Energy Metabolism Are Differentially Expressed During the Day-Night Cycle in Murine Retinal  
634 Pigment Epithelium. Investigative ophthalmology & visual science 61 (5):49. doi:10.1167/iovs.61.5.49
- 635 59. Louer EMM, Gunzel D, Rosenthal R, Carmone C, Yi G, Stunnenberg HG, den Hollander AI, Deen PMT (2020)  
636 Differential day-night expression of tight junction components in murine retinal pigment epithelium.  
637 Experimental eye research 193:107985. doi:10.1016/j.exer.2020.107985
- 638 60. DeVera C, Tosini G (2020) Circadian analysis of the mouse retinal pigment epithelium transcriptome.  
639 Experimental eye research 193:107988. doi:10.1016/j.exer.2020.107988

- 640 61. Mure LS, Le HD, Benegiamo G, Chang MW, Rios L, Jillani N, Ngotho M, Kariuki T, Dkhissi-Benyahya O,  
641 Cooper HM, Panda S (2018) Diurnal transcriptome atlas of a primate across major neural and peripheral  
642 tissues. *Science (New York, NY)* 359 (6381). doi:10.1126/science.aao0318
- 643 62. Baba K, Sengupta A, Tosini M, Contreras-Alcantara S, Tosini G (2010) Circadian regulation of the PERIOD  
644 2::LUCIFERASE bioluminescence rhythm in the mouse retinal pigment epithelium-choroid. *Molecular vision*  
645 16:2605-2611
- 646 63. Baba K, DeBruyne JP, Tosini G (2017) Dopamine 2 Receptor Activation Entrain Circadian Clocks in Mouse  
647 Retinal Pigment Epithelium. *Scientific reports* 7 (1):5103. doi:10.1016/j.exer.2017.09.007
- 648 64. Milićević N, Mazzaro N, de Bruin I, Wils E, Ten Brink J, Asbroek AT, Mendoza J, Bergen A, Felder-  
649 Schmittbuhl MP (2019) Rev-Erbalpha and Photoreceptor Outer Segments modulate the Circadian Clock in  
650 Retinal Pigment Epithelial Cells. *Scientific reports* 9 (1):11790. doi:10.1038/s41598-019-48203-3
- 651 65. Milićević N, Duursma A, Ten Asbroek A, Felder-Schmittbuhl MP, Bergen AA (2019) Does the circadian  
652 clock make RPE-mediated ion transport "tick" via SLC12A2 (NKCC1)? *Chronobiology international* 36  
653 (11):1592-1598. doi:10.1080/07420528.2019.1653317
- 654 66. Milićević N, Ten Brink JB, Ten Asbroek A, Bergen AA, Felder-Schmittbuhl MP (2020) The circadian clock  
655 regulates RPE-mediated lactate transport via SLC16A1 (MCT1). *Experimental eye research* 190:107861.  
656 doi:10.1016/j.exer.2019.107861
- 657 67. Ikarashi R, Akechi H, Kanda Y, Ahmad A, Takeuchi K, Morioka E, Sugiyama T, Ebisawa T, Ikeda M, Ikeda M  
658 (2017) Regulation of molecular clock oscillations and phagocytic activity via muscarinic Ca(2+) signaling in  
659 human retinal pigment epithelial cells. *Scientific reports* 7:44175. doi:10.1038/srep44175
- 660 68. Morioka E, Kanda Y, Koizumi H, Miyamoto T, Ikeda M (2018) Histamine Regulates Molecular Clock  
661 Oscillations in Human Retinal Pigment Epithelial Cells via H1 Receptors. *Frontiers in endocrinology* 9:108.  
662 doi:10.3389/fendo.2018.00108
- 663 69. Johansson JK, Karema-Jokinen VI, Hakanen S, Jylhä A, Uusitalo H, Vihinen-Ranta M, Skottman H, Ihalainen  
664 TO, Nymark S (2019) Sodium channels enable fast electrical signaling and regulate phagocytosis in the retinal  
665 pigment epithelium. *BMC biology* 17 (1):63. doi:10.1186/s12915-019-0681-1
- 666 70. Nandrot EF, Anand M, Almeida D, Atabai K, Sheppard D, Finnemann SC (2007) Essential role for MFG-E8  
667 as ligand for alphavbeta5 integrin in diurnal retinal phagocytosis. *Proceedings of the National Academy of*  
668 *Sciences of the United States of America* 104 (29):12005-12010. doi:10.1073/pnas.0704756104
- 669 71. Tang Y, Lu Q, Wei Y, Han L, Ji R, Li Q, Lu Q (2015) MERTK deficiency alters expression of microRNAs in the  
670 retinal pigment epithelium cells. *Metabolic Brain Disease* 30 (4):943-950. doi:10.1007/s11011-015-9653-5

671
